# Supplementary material
Source: Springer Nature journal article supplement (https://www.springermedizin.de/resource/supplementary/12889_2011_4044_MOESM2_ESM.pdf/9491168)
Supplement: MOESM2 [file 9491168]

**MAPPING**

1502 foreigners  
(25 clusters with  
replacement)

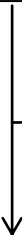

450 were excluded:  
74 other nationalities  
376 not eligible Latin  
Americans

1052 eligible Latin  
Americans (25 clusters)

**Random Sampling**

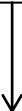

400 respondents  
(16 respondents per cluster  
without replacement)

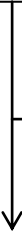

57 not at home  
47 moved out  
2 overstayers  
12 refused

**SURVEY**

282 respondents  
participated in the study
